# Supplementary material
Source: MDPI journal article supplement (https://www.mdpi.com/2073-445X/10/4/426)
Supplement: s1 [file s1]

## Supplementary Materials

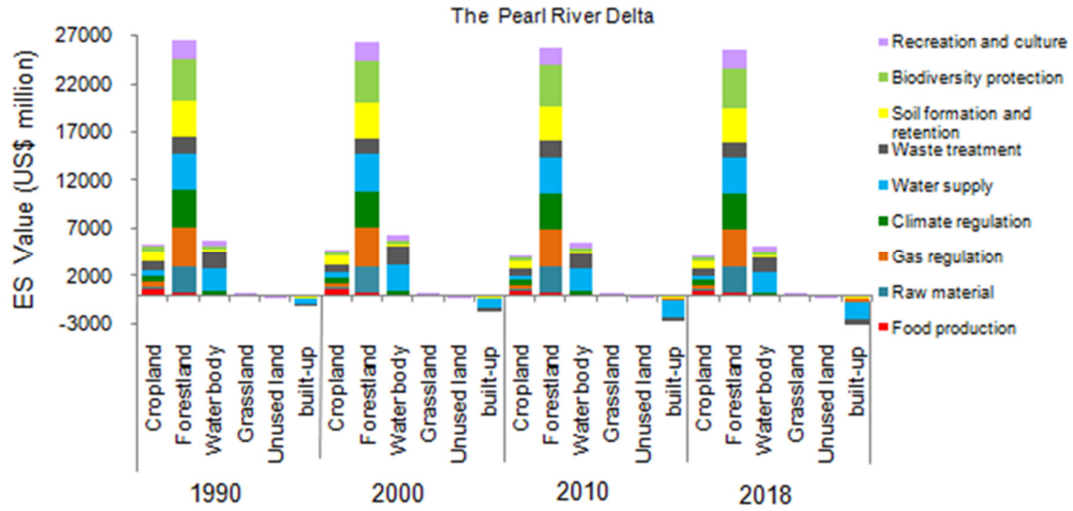

**Figure S1.** The ecosystem service value in the Pear River Delta of Guangdong from 1990 to 2018.

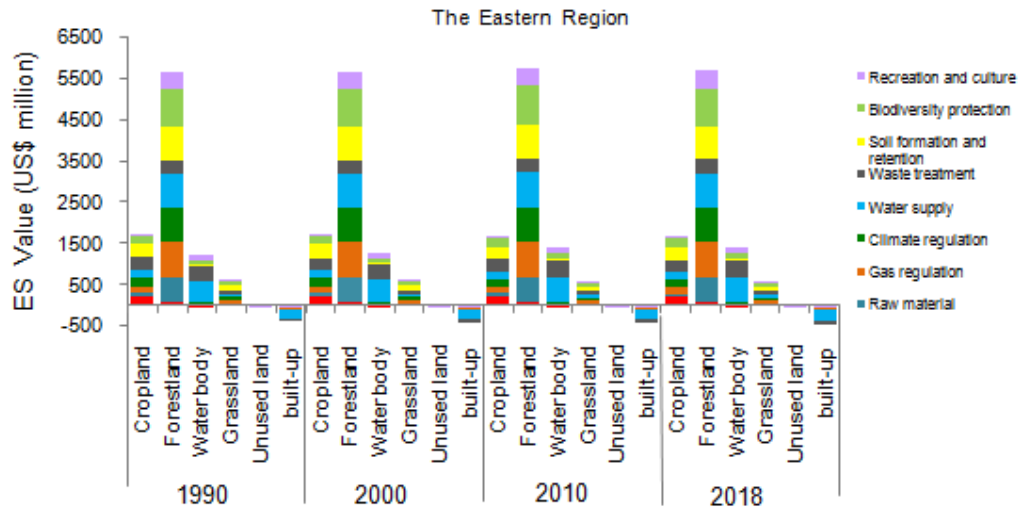

**Figure S2.** The ecosystem service value in the Eastern Region of Guangdong from 1990 to 2018.

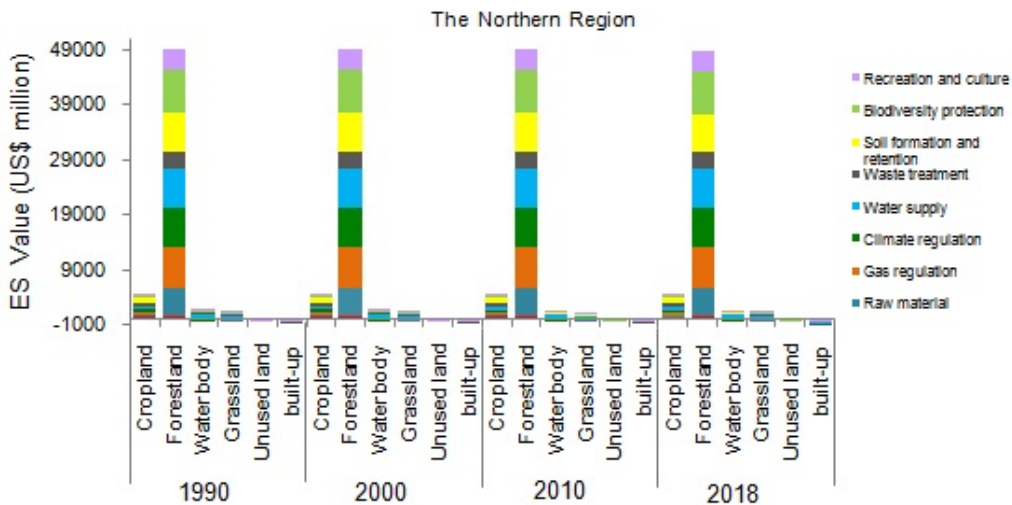

**Figure S3.** The ecosystem service value in the Northern Mountainous Region of Guangdong from 1990

to 2018.

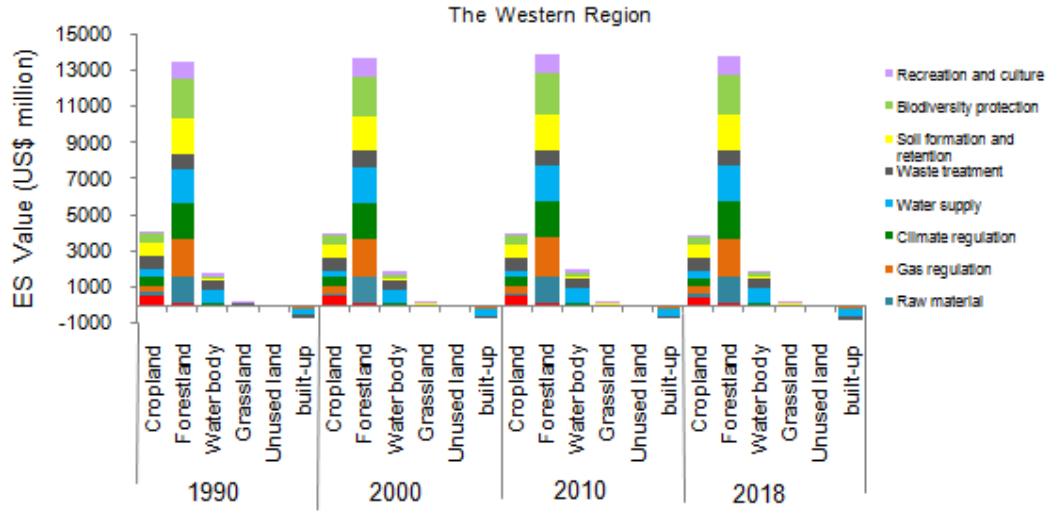

**Figure S4.** The ecosystem service value in the Western Region of Guangdong from 1990 to 2018.

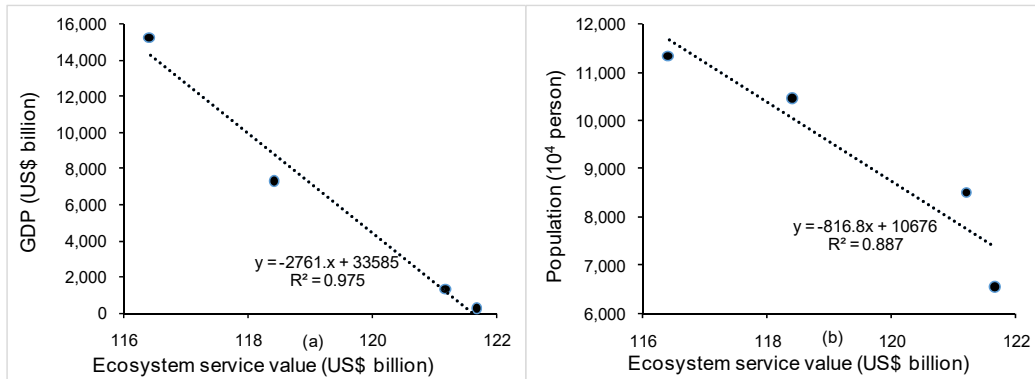

**Figure S5.** Relationship between (a) total ecosystem service value and GDP ( US\$ in 2018),(b) total ecosystem service value and population in Guangdong province from 1990 to 2018.

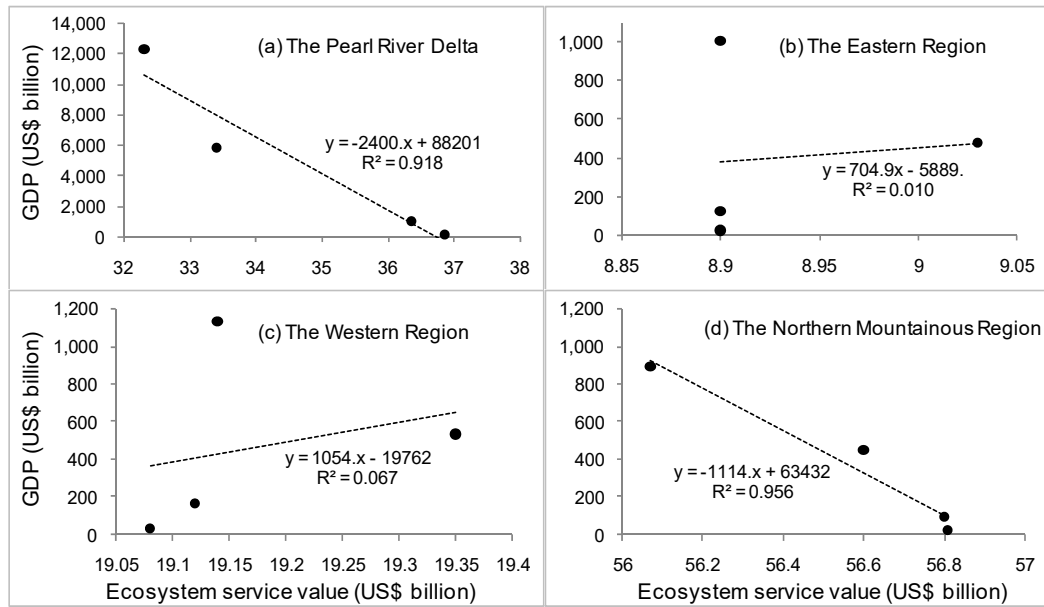

**Figure S6.** Relationship between total ecosystem service value and GDP (US\$ in 2018) in the four regions in Guangdong province from 1990 to 2018.

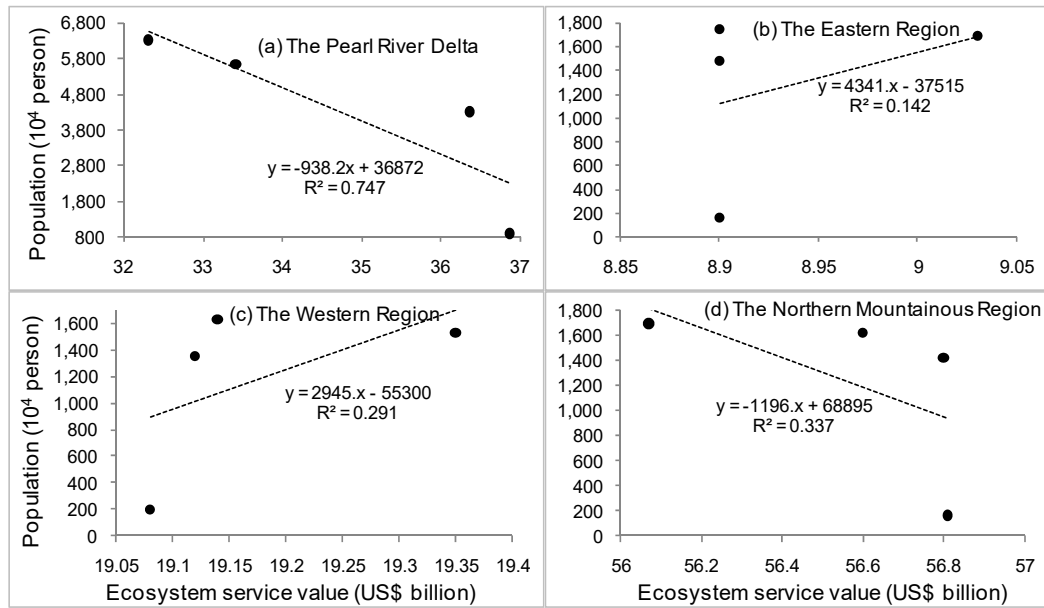

**Figure S7.** Relationship between total ecosystem service value and population in the four regions in Guangdong province from 1990 to 2018.

**Table S1.**Ecosystem service trade-off degree in Guangdong province from1990 to 2018.

| 1990–2018        | FP    | RM    | GR    | CR    | WS    | WT    | SFR   | BP    | RC    |
|------------------|-------|-------|-------|-------|-------|-------|-------|-------|-------|
| FP               | 1.00  | 1.18  | 0.28  | 0.61  | 0.12  | 0.24  | 0.48  | 0.66  | 1.64  |
| RM               | 0.85  | 1.00  | 0.24  | 0.51  | 0.10  | 0.20  | 0.41  | 0.56  | 1.39  |
| GR               | 3.56  | 4.20  | 1.00  | 2.16  | 0.42  | 0.86  | 1.71  | 2.37  | 5.82  |
| CR               | 1.64  | 1.94  | 0.46  | 1.00  | 0.19  | 0.40  | 0.79  | 1.09  | 2.69  |
| WS               | 8.50  | 10.04 | 2.39  | 5.17  | 1.00  | 2.05  | 4.09  | 5.65  | 13.91 |
| WT               | 4.14  | 4.88  | 1.16  | 2.52  | 0.49  | 1.00  | 1.99  | 2.75  | 6.77  |
| SFR              | 2.08  | 2.45  | 0.58  | 1.26  | 0.24  | 0.50  | 1.00  | 1.38  | 3.40  |
| BP               | 1.50  | 1.78  | 0.42  | 0.91  | 0.18  | 0.36  | 0.72  | 1.00  | 2.46  |
| RC               | 0.61  | 0.72  | 0.17  | 0.37  | 0.07  | 0.15  | 0.29  | 0.41  | 1.00  |
| <b>1990–2000</b> |       |       |       |       |       |       |       |       |       |
| FP               | 1.00  | 2.37  | 0.42  | 1.33  | 0.88  | –2.10 | 0.57  | 3.52  | –1.22 |
| RM               | 0.42  | 1.00  | 0.18  | 0.56  | 0.37  | –0.89 | 0.24  | 1.48  | –0.52 |
| GR               | 2.41  | 5.71  | 1.00  | 3.19  | 2.12  | –5.06 | 1.37  | 8.47  | –2.95 |
| CR               | 0.75  | 1.79  | 0.31  | 1.00  | 0.66  | –1.58 | 0.43  | 2.65  | –0.92 |
| WS               | 1.14  | 2.69  | 0.47  | 1.51  | 1.00  | –2.39 | 0.64  | 4.00  | –1.39 |
| WT               | –0.48 | –1.13 | –0.20 | –0.63 | –0.42 | 1.00  | –0.27 | –1.68 | 0.58  |
| SFR              | 1.76  | 4.18  | 0.73  | 2.34  | 1.55  | –3.70 | 1.00  | 6.20  | –2.16 |
| BP               | 0.28  | 0.67  | 0.12  | 0.38  | 0.25  | –0.60 | 0.16  | 1.00  | –0.35 |
| RC               | –0.82 | –1.94 | –0.34 | –1.08 | –0.72 | 1.72  | –0.46 | –2.88 | 1.00  |
| <b>2000–2010</b> |       |       |       |       |       |       |       |       |       |
| FP               | 1.00  | 2.01  | 0.32  | 0.73  | 0.10  | 0.19  | 0.60  | 0.76  | 1.23  |
| RM               | 0.50  | 1.00  | 0.16  | 0.36  | 0.05  | 0.09  | 0.30  | 0.38  | 0.61  |
| GR               | 3.13  | 6.29  | 1.00  | 2.28  | 0.32  | 0.58  | 1.87  | 2.37  | 3.84  |
| CR               | 1.37  | 2.76  | 0.44  | 1.00  | 0.14  | 0.25  | 0.82  | 1.04  | 1.68  |
| WS               | 9.90  | 19.90 | 3.16  | 7.21  | 1.00  | 1.84  | 5.90  | 7.49  | 12.15 |
| WT               | 5.39  | 10.85 | 1.72  | 3.93  | 0.54  | 1.00  | 3.22  | 4.08  | 6.62  |
| SFR              | 1.68  | 3.37  | 0.54  | 1.22  | 0.17  | 0.31  | 1.00  | 1.27  | 2.06  |
| BP               | 1.32  | 2.66  | 0.42  | 0.96  | 0.13  | 0.24  | 0.79  | 1.00  | 1.62  |
| RC               | 0.81  | 1.64  | 0.26  | 0.59  | 0.08  | 0.15  | 0.49  | 0.62  | 1.00  |
| <b>2010–2018</b> |       |       |       |       |       |       |       |       |       |
| FP               | 1.00  | 0.35  | 0.14  | 0.23  | 0.05  | 0.10  | 0.25  | 0.22  | 0.34  |
| RM               | 2.82  | 1.00  | 0.39  | 0.65  | 0.15  | 0.29  | 0.71  | 0.61  | 0.96  |
| GR               | 7.29  | 2.58  | 1.00  | 1.68  | 0.38  | 0.75  | 1.83  | 1.58  | 2.48  |
| CR               | 4.35  | 1.54  | 0.60  | 1.00  | 0.22  | 0.45  | 1.09  | 0.94  | 1.48  |
| WS               | 19.40 | 6.87  | 2.66  | 4.46  | 1.00  | 1.99  | 4.88  | 4.21  | 6.60  |
| WT               | 9.77  | 3.46  | 1.34  | 2.25  | 0.50  | 1.00  | 2.46  | 2.12  | 3.32  |
| SFR              | 3.98  | 1.41  | 0.55  | 0.91  | 0.21  | 0.41  | 1.00  | 0.86  | 1.35  |
| BP               | 4.61  | 1.63  | 0.63  | 1.06  | 0.24  | 0.47  | 1.16  | 1.00  | 1.57  |
| RC               | 2.94  | 1.04  | 0.40  | 0.68  | 0.15  | 0.30  | 0.74  | 0.64  | 1.00  |

Note: FP-Food production; RM-Raw material; GR-Gas regulation; CR-Climate regulation; WS-Water supply; WT-Waste treatment; SFR-Soil formation and retention; BP-Biodiversity protection; RC-Recreation and culture.
